# Supplementary figures and images for: Myostatin Deficiency Enhances Antioxidant Capacity of Bovine Muscle via the SMAD‐AMPK‐G6PD Pathway
Source: Hindawi journal article supplement (doi:10.1155/2022/3497644), 2022-01-01

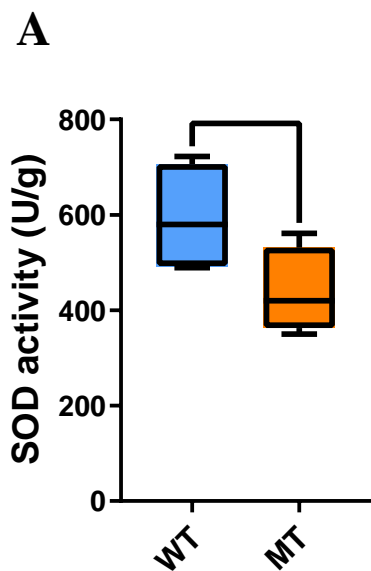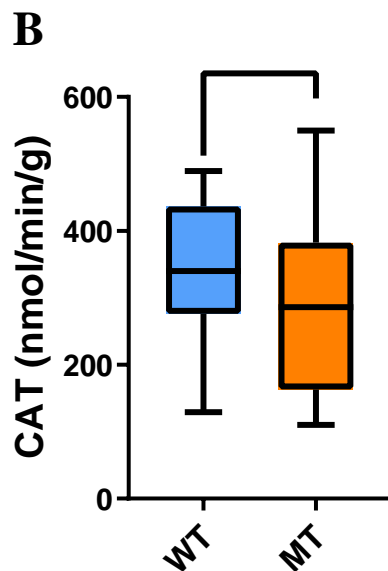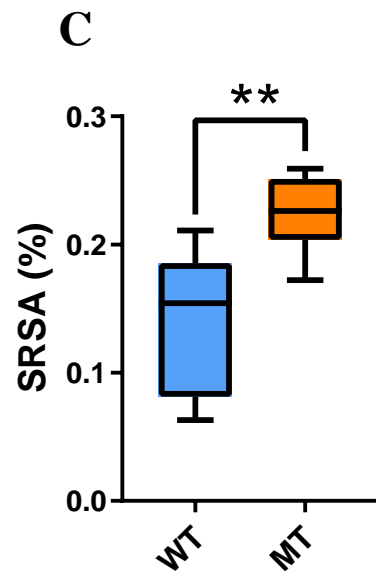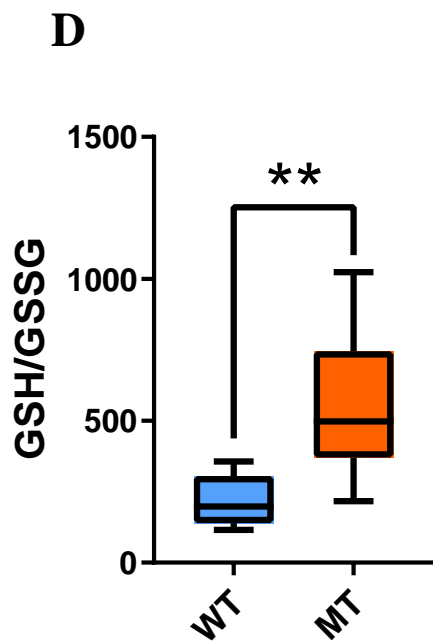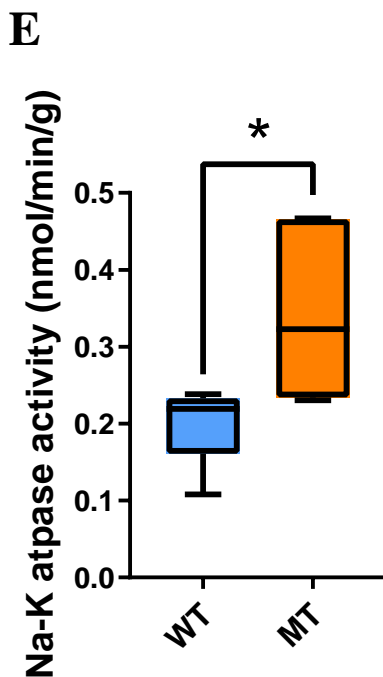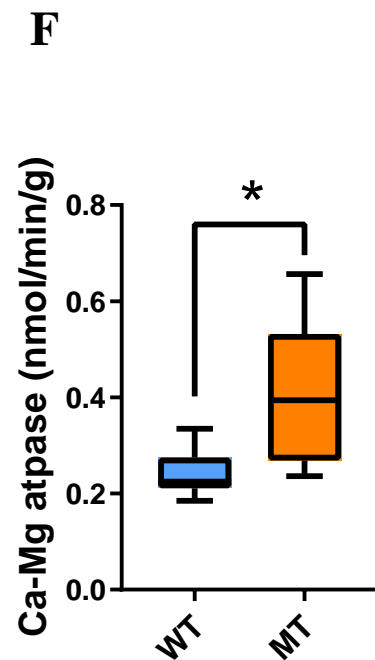

Supplement: f1 [file 3497644.f1.zip]

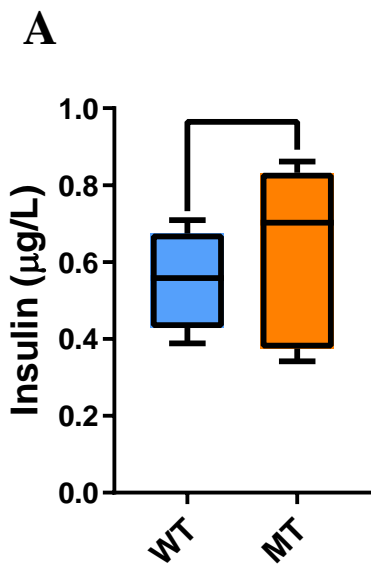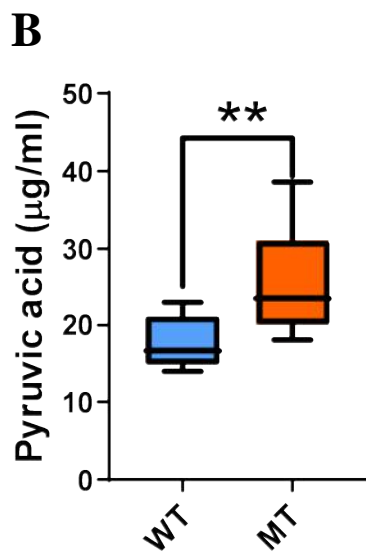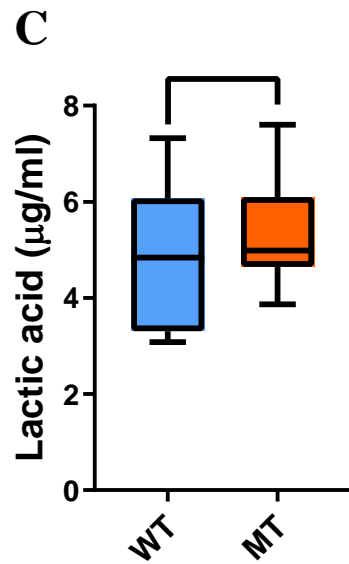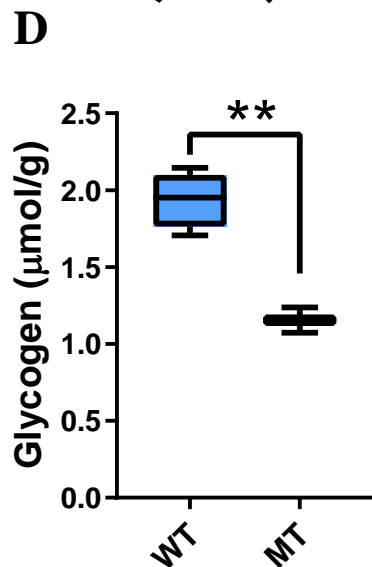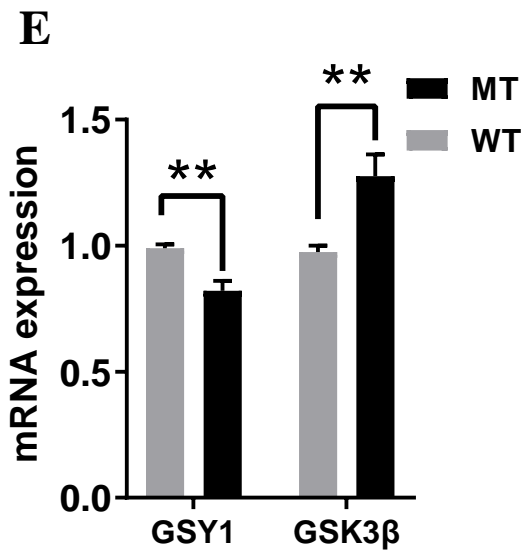

Supplement: f1 [file 3497644.f1.zip]
